# Supplementary material for: Emotional Distress in Portuguese Cancer Patients: The Use of the Emotion Thermometers
Source: Preprints.org preprint supplement (doi:10.20944/preprints202307.0881.v1), 2023-07-13
Supplement: Supplementary file 3 [file supplementary]

**Supplementary material**

**Table A1. Unadjusted generalized linear model results for the univariate relationship between patient characteristics, problem list, and distress**

|  | **Distress** | |
| --- | --- | --- |
|  | Coefficient | Std. Err. |
| **Demographic** |  |  |
| Age [mean (SD)] | 0.00 | 0.00 |
| Female | 0.12*** | 0.03 |
| **Disease phase** |  |  |
| Treatment | Ref. |  |
| Survival | -0.01 | 0.03 |
| Palliative | 0.07 | 0.04 |
| Diagnosis | 0.05 | 0.04 |
| Relapse | 0.12*** | 0.05 |
| **Practical** |  |  |
| Housing | 0.11*** | 0.03 |
| Security | 0.13*** | 0.03 |
| Work/school | 0.09*** | 0.02 |
| Transportation | 0.07 | 0.04 |
| Childcare | 0.06 | 0.05 |
| **Family** |  |  |
| Dealing with partner | 0.08*** | 0.02 |
| Dealing with children | 0.10*** | 0.02 |
| **Emotional** |  |  |
| Worry | 0.26*** | 0.07 |
| Ferars | 0.18*** | 0.03 |
| Sadness | 0.37*** | 0.04 |
| Depression | 0.27*** | 0.02 |
| Nervousness | 0.18*** | 0.03 |
| **Spiritual** |  |  |
| Relating to God | 0.10*** | 0.03 |
| Loss of Faith | 0.15*** | 0.03 |
| **Physical** |  |  |
| Pain | 0.12*** | 0.02 |
| Nausea | 0.09*** | 0.02 |
| Fatigue | 0.12*** | 0.03 |
| Sleep | 0.14*** | 0.02 |
| Getting around | 0.09*** | 0.02 |
| Bathing/dressing | 0.13*** | 0.03 |
| Breathing | 0.15*** | 0.02 |
| Mouth sores | 0.02 | 0.03 |
| Eating | 0.14*** | 0.02 |
| Indigestion | 0.09*** | 0.03 |
| Constipation | 0.10*** | 0.02 |
| Diarrhoea | 0.04 | 0.03 |
| Changes in urination | 0.07** | 0.03 |
| Fevers | -0.06 | 0.08 |
| Dry/itchy skin | 0.04 | 0.02 |
| Dry/congested nose | 0.03 | 0.03 |
| Tingling in hands/feet | 0.05** | 0.02 |
| Feeling swollen | 0.08*** | 0.02 |
| Sexual | 0.03 | 0.02 |
| **Other** |  |  |
| Economic difficulties | 0.11*** | 0.02 |
| Legal problems | 0.12*** | 0.03 |
| Communication with health professionals | 0.10*** | 0.03 |
| Body image concerns | 0.11*** | 0.02 |
| Difficulties in obtaining information about the disease | 0.09*** | 0.03 |

Note: **p<0.05; ***p<0.01

**Table A2. Generalized linear model results for the relationship between patient characteristics and problem list, and distress**

|  | **Distress** | |
| --- | --- | --- |
|  | Coefficient | Std. Err. |
| **Demographics** |  |  |
| Female | 0.09*** | 0.03 |
| **Disease phase** |  |  |
| Treatment | Ref. |  |
| Survival | 0.00 | 0.03 |
| Diagnosis | 0.08 | 0.04 |
| Relapse | 0.06 | 0.04 |
| Palliative | 0.18*** | 0.06 |
| **Practical** |  |  |
| Housing | 0.03 | 0.03 |
| Security | 0.01 | 0.03 |
| Work/school | 0.03 | 0.02 |
| **Family** |  |  |
| Dealing with partner | 0.03 | 0.02 |
| Dealing with children | 0.05 | 0.02 |
| **Emotional** |  |  |
| Worry | 0.11 | 0.07 |
| Fears | 0.02 | 0.04 |
| Sadness | 0.22*** | 0.05 |
| Depression | 0.16*** | 0.02 |
| Nervousness | 0.04 | 0.03 |
| **Spiritual** |  |  |
| Relating to God | 0.01 | 0.03 |
| Loss of Faith | 0.04 | 0.03 |
| **Physical** |  |  |
| Pain | 0.01 | 0.03 |
| Nausea | 0.02 | 0.02 |
| Fatigue | -0.02 | 0.03 |
| Sleep | 0.08*** | 0.02 |
| Getting around | -0.02 | 0.03 |
| Bathing/dressing | 0.05 | 0.03 |
| Breathing | 0.09*** | 0.03 |
| Eating | 0.05 | 0.03 |
| Indigestion | -0.03 | 0.03 |
| Constipation | 0.01 | 0.02 |
| Changes in urination | 0.03 | 0.03 |
| Tingling in hands/feet | -0.05 | 0.03 |
| Feeling swollen | -0.04 | 0.02 |
| Economic difficulties | 0.01 | 0.03 |
| Legal problems | 0.05 | 0.04 |
| Communication with health professionals | 0.03 | 0.03 |
| Body image concerns | 0.01 | 0.02 |
| Difficulties in obtaining information about the disease | 0.00 | 0.03 |

Note: ***p<0.01

**Table A3. Generalized linear model results for the relationship between patient characteristics and problem list (excluding emotional problems), and distress**

|  | **Distress** | |
| --- | --- | --- |
|  | Coefficient | Std. Err. |
| **Demographics** |  |  |
| Female | 0.10*** | 0.03 |
| **Disease phase** |  |  |
| Treatment | Ref. |  |
| Survival | -0.01 | 0.03 |
| Diagnosis | 0.09** | 0.04 |
| Relapse | 0.06 | 0.04 |
| Palliative | 0.14*** | 0.05 |
| **Practical** |  |  |
| Housing | 0.02 | 0.03 |
| Security | 0.05 | 0.03 |
| Work/school | 0.05** | 0.02 |
| **Family** |  |  |
| Dealing with partner | 0.03 | 0.02 |
| Dealing with children | 0.06** | 0.03 |
| **Spiritual** |  |  |
| Relating to God | 0.01 | 0.04 |
| Loss of Faith | 0.07** | 0.03 |
| **Physical** |  |  |
| Pain | 0.03 | 0.03 |
| Nausea | 0.03 | 0.02 |
| Fatigue | 0.03 | 0.03 |
| Sleep | 0.10*** | 0.03 |
| Getting around | -0.01 | 0.03 |
| Bathing/dressing | 0.06 | 0.03 |
| Breathing | 0.08*** | 0.03 |
| Eating | 0.07** | 0.03 |
| Indigestion | -0.02 | 0.03 |
| Constipation | 0.03 | 0.02 |
| Changes in urination | 0.03 | 0.03 |
| Tingling in hands/feet | -0.05 | 0.03 |
| Feeling swollen | -0.02 | 0.03 |
| Economic difficulties |  |  |
| Legal problems | 0.03 | 0.03 |
| Communication with health professionals | 0.03 | 0.04 |
| Body image concerns | 0.04** | 0.03 |
| Difficulties in obtaining information about the disease | 0.05 | 0.02 |

Note: **p<0.05; ***p<0.01
